# Supplementary material
Source: Springer Nature journal article supplement (https://www.springermedizin.de/resource/supplementary/12891_2014_2118_MOESM1_ESM.pdf/9509484)
Supplement: MOESM1 [file 9509484]

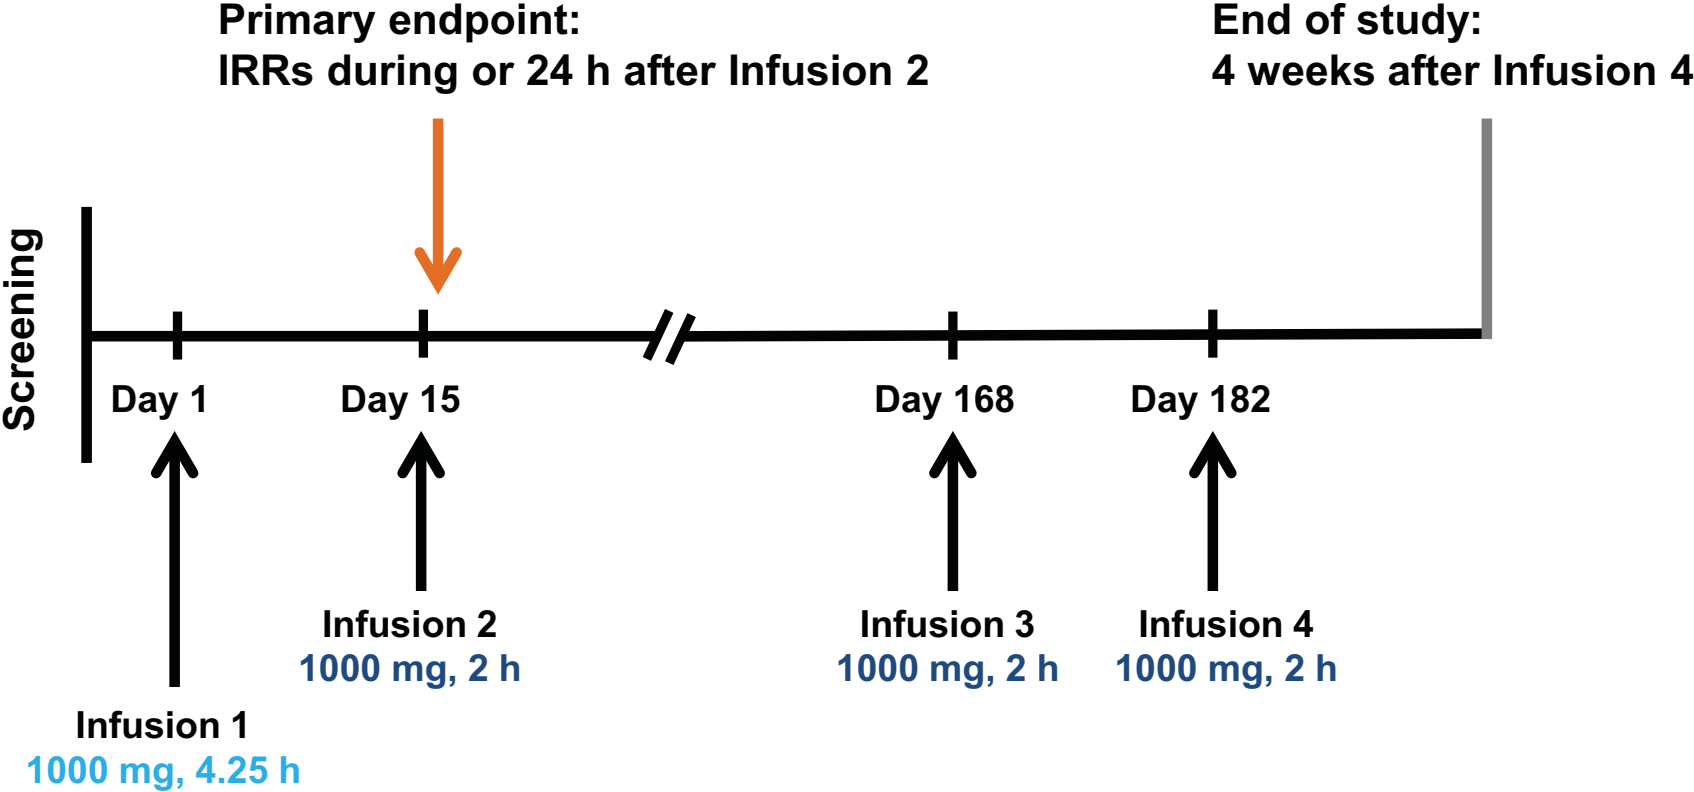

**Primary endpoint:  
IRRs during or 24 h after Infusion 2**

**End of study:  
4 weeks after Infusion 4**

**Screening**

**Day 1**

**Day 15**

**Day 168**

**Day 182**

**Infusion 1  
1000 mg, 4.25 h**

**Infusion 2  
1000 mg, 2 h**

**Infusion 3  
1000 mg, 2 h**

**Infusion 4  
1000 mg, 2 h**
